# Supplementary material for: Anticancer potential of β-sitosterol and oleanolic acid as through inhibition of human estrogenic 17beta-hydroxysteroid dehydrogenase type-1 based on an in silico approach
Source: Royal Society of Chemistry journal article supplement (doi:10.1039/d2ra03092f), 2022-01-01
Supplement: d2ra03092f1.pdf [file d2ra03092f1.pdf]

## Supplementary materials

### **$\beta$ -sitosterol and oleanolic acid as anticancer potential through inhibition of human estrogenic *17beta-hydroxysteroid dehydrogenase type-1* based on *in silico* approach**

Alfinda Novi Kristanti<sup>a,b,\*</sup>, Nanik Siti Aminah<sup>a,b</sup>, Imam Siswanto<sup>a,c</sup>, Yosephine Sri Wulan Manuhara<sup>b,d</sup>  
Muhammad Ikhlas Abdjan<sup>a,e</sup>, Andika Pramudya Wardana<sup>a,e</sup>, Ei Ei Aung<sup>a,f</sup>, Yoshiaki Takaya<sup>g</sup>

<sup>a</sup>Departement of Chemistry, Faculty of Science and Technology, Universitas Airlangga, Surabaya 60115, Indonesia. E-mail: nanik-s-a@fst.unair.ac.id

<sup>b</sup>Biotechnology of Tropical Medicinal Plants Research Group, Universitas Airlangga

<sup>c</sup>Bioinformatic Laboratory, UCoE Research Center for Bio-Molecule Engineering Universitas Airlangga, Surabaya, Indonesia

<sup>d</sup>Departement of Biology, Faculty of Science and Technology, Universitas Airlangga, Surabaya 60115, Indonesia

<sup>e</sup>Ph.D. Student of Mathematics and Natural Sciences, Faculty of Science and Technology, Universitas Airlangga, Komplek Kampus C UNAIR, Jl. Mulyorejo, 60115, Surabaya, Indonesia

<sup>f</sup>Departement of Chemistry, Yadanarbon University, Amarapura Township, Mandalay, Myanmar

<sup>g</sup>Faculty of Pharmacy, Meijo University, 150 Yagotoyama, Tempaku, Nagoya, 468-8503 Japan

**Tables:**

Table S1 Drug-likeness: Physicochemical properties, Lipinski's rule of five, and Veber's rule.

| <b>Parameters</b>                      | <b>TES</b> | <b>C1</b> | <b>C2</b> |
|----------------------------------------|------------|-----------|-----------|
| <b>Physicochemical</b>                 |            |           |           |
| Log $P_{o/w}$ (X LogP3)                | 3.32       | 9.34      | 7.49      |
| Log S (ESOL)                           | -3.72      | -7.90     | -7.32     |
| Fraction Csp3                          | 0.84       | 0.93      | 0.90      |
| <b>Lipinski's rule (RO5)</b>           |            |           |           |
| M LogP                                 | 3.59       | 6.73      | 5.82      |
| MW (g/mol)                             | 288.42     | 414.71    | 456.70    |
| $\Sigma$ HBD                           | 1          | 1         | 2         |
| $\Sigma$ HBA                           | 2          | 1         | 3         |
| <b>Veber's rule</b>                    |            |           |           |
| Rot. Bonds                             | 0          | 6         | 1         |
| TPSA ( $\text{\AA}^2$ )                | 37.30      | 20.23     | 57.53     |
| <b>Lipinski and Veber valiations/n</b> | 0          | 1         | 1         |

Table S2 ADMET prediction of candidates used pkCSM server.

| Parameters                                              | TES   | C1    | C2    |
|---------------------------------------------------------|-------|-------|-------|
| <b>Absorption</b>                                       |       |       |       |
| Water solubility (log mol/L)                            | -4.73 | -6.88 | -4.07 |
| Caco-2 Permeability (log Papp in 10 <sup>-6</sup> cm/s) | 1.54  | 1.21  | 1.36  |
| Intestinal Absorption-Human (% Absorbed)                | 96.53 | 94.07 | 98.08 |
| <b>Distribution</b>                                     |       |       |       |
| CNS permeability (log PS)                               | -2.07 | -1.33 | -1.01 |
| BBB Permeability (log BB)                               | 0.16  | 0.79  | -0.63 |
| <b>Metabolism</b>                                       |       |       |       |
| CYP1A2 Inhibitor                                        | No    | No    | No    |
| CYP2C19 Inhibitor                                       | No    | No    | No    |
| CYP2C9 Inhibitor                                        | No    | No    | No    |
| CYP2D6 Inhibitor                                        | No    | No    | No    |
| CYP3A4 Inhibitor                                        | No    | No    | No    |
| <b>Excretion</b>                                        |       |       |       |
| Total Clearance (log mL/min/Kg)                         | 0.92  | 0.62  | -0.08 |
| Renal OCT2 Substrate                                    | Yes   | No    | No    |
| <b>Toxicity</b>                                         |       |       |       |
| AMES Toxicity                                           | No    | No    | No    |
| Hepatotoxicity                                          | No    | No    | Yes   |
| Skin Sensitisation                                      | No    | No    | No    |

Table S3 Molecular docking results to identify the ligand- HSD17B1 Interaction.

| Complex             | Interactions        |                  | Distance (Å) | Types                      |
|---------------------|---------------------|------------------|--------------|----------------------------|
|                     | From                | To               |              |                            |
| TES- HSD17B1        | His221(HE2)         | O17              | 1.76         | Conventional hydrogen bond |
|                     | H-O17               | Glu282:OE2       | 2.10         | Conventional hydrogen bond |
|                     | Pro187(Alkyl)       | Ring B           | 4.64         | Alkyl                      |
|                     | Val225(Alkyl)       | Ring C           | 4.27         | Alkyl                      |
|                     | C15                 | Leu149(Alkyl)    | 4.44         | Alkyl                      |
|                     | C18                 | Leu149(Alkyl)    | 4.33         | Alkyl                      |
|                     | Tyr218(Pi-Orbitals) | C18              | 5.28         | Pi-Alkyl                   |
|                     | His221(Pi-Orbitals) | C18              | 5.27         | Pi-Alkyl                   |
| C1-HSD17B1          | Phe259(Pi-Orbitals) | C15              | 4.58         | Pi-Alkyl                   |
|                     | C18                 | Leu149(Alkyl)    | 5.07         | Alkyl                      |
|                     | C19                 | Val188(Alkyl)    | 4.80         | Alkyl                      |
|                     | C1                  | Cys185(Alkyl)    | 4.46         | Alkyl                      |
|                     | C21                 | Pro187(Alkyl)    | 4.35         | Alkyl                      |
|                     | C24 <sup>2</sup>    | Val143(Alkyl)    | 4.28         | Alkyl                      |
|                     | C24 <sup>2</sup>    | Met147(Alkyl)    | 4.84         | Alkyl                      |
|                     | C24 <sup>2</sup>    | Leu149(Alkyl)    | 4.70         | Alkyl                      |
|                     | C27                 | Leu149(Alkyl)    | 4.57         | Alkyl                      |
|                     | C27                 | Val283(Alkyl)    | 4.78         | Alkyl                      |
|                     | Tyr155(Pi-Orbitals) | C18              | 4.75         | Pi-Alkyl                   |
|                     | Tyr155(Pi-Orbitals) | C5=C6 (Ring B)   | 5.46         | Pi-Alkyl                   |
|                     | Tyr218(Pi-Orbitals) | C27              | 4.99         | Pi-Alkyl                   |
|                     | His221(Pi-Orbitals) | C26              | 4.36         | Pi-Alkyl                   |
|                     | His221(Pi-Orbitals) | C27              | 4.89         | Pi-Alkyl                   |
| Phe259(Pi-Orbitals) | C24 <sup>2</sup>    | 4.17             | Pi-Alkyl     |                            |
| C2-HSD17B1          | Ser142(HG)          | O28a             | 1.82         | Conventional hydrogen bond |
|                     | Tyr155(HH)          | O28a             | 2.00         | Conventional hydrogen bond |
|                     | H-O28a              | Gly186(O)        | 1.75         | Conventional hydrogen bond |
|                     | Ser142(HB3)         | O28a             | 2.66         | Carbon hydrogen bond       |
|                     | C30                 | Leu149(Alkyl)    | 5.27         | Alkyl                      |
|                     | Tyr155(Pi-Orbitals) | C12=C13 (Ring C) | 5.48         | Pi-Alkyl                   |
|                     | Tyr155(Pi-Orbitals) | C30              | 4.64         | Pi-Alkyl                   |

Table S4 Post-MD of each system: The average value of trajectories analysis using 100 ns simulation time.

| <b>Parameters</b>                          | <b>TES-HSD17B1</b> | <b>C1-HSD17B1</b> | <b>C2-HSD17B1</b> |
|--------------------------------------------|--------------------|-------------------|-------------------|
| Total energy (kcal mol <sup>-1</sup> )     | -112530 ± 894.54   | -112389 ± 900.94  | -112358 ± 900.91  |
| Potential energy (kcal mol <sup>-1</sup> ) | -142297 ± 771.59   | -142174 ± 777.02  | -142134 ± 778.60  |
| Kinetic energy (kcal mol <sup>-1</sup> )   | 29766 ± 195.71     | 29784 ± 198.71    | 29776 ± 196.95    |
| RMSD of complex (nm)                       | 0.26 ± 0.03        | 0.26 ± 0.03       | 0.27 ± 0.04       |
| RoG (nm)                                   | 19.73 ± 0.14       | 19.79 ± 0.09      | 19.89 ± 0.11      |
| RMSF (nm)                                  | 1.29 ± 0.41        | 0.93 ± 0.32       | 1.24 ± 0.45       |
| SASA (nm)                                  | 10.05 ± 1.17       | 9.46 ± 1.00       | 12.89 ± 1.02      |

Figures:

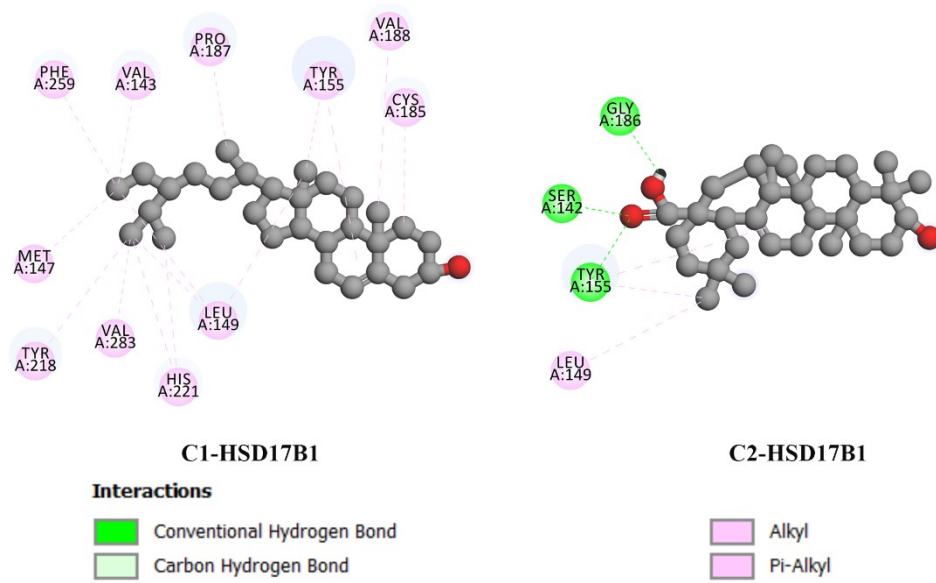

Fig. S1 Molecular docking analysis: The candidate-HSD17B1 Interaction

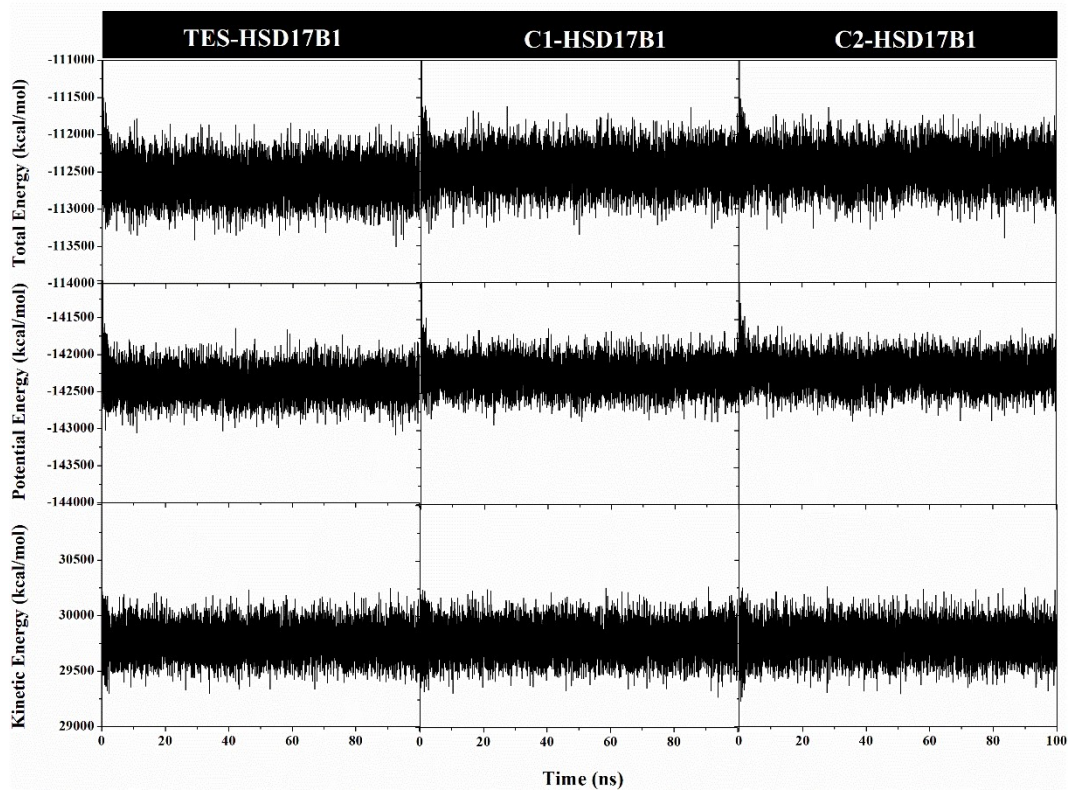

Fig. S2 The *mdout* analysis plotted along 100 ns of MD simulation of each system.

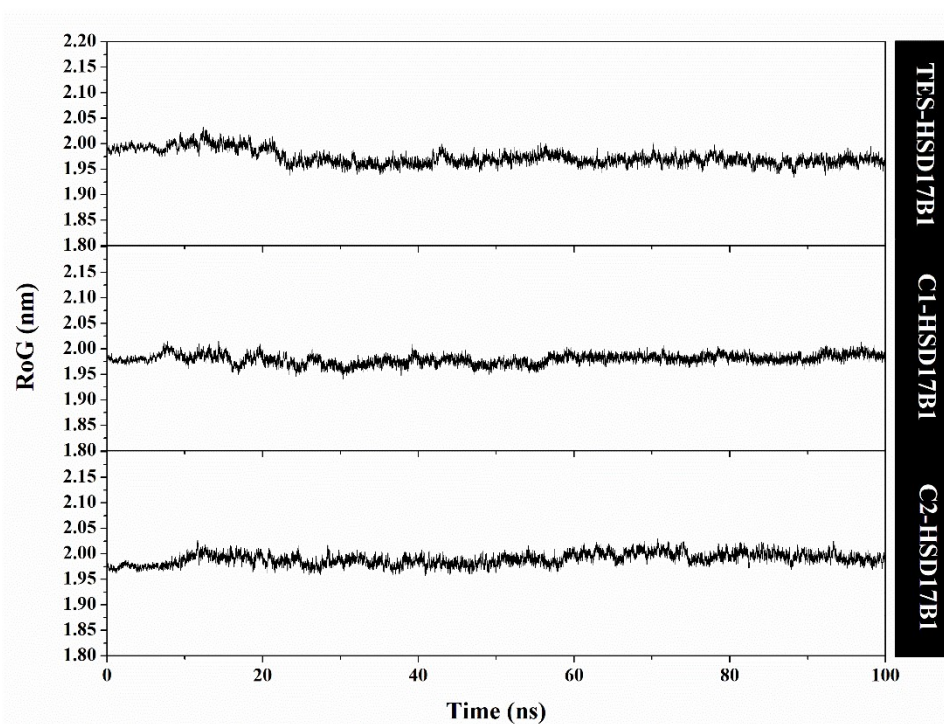

Fig. S3 Trajectories analysis: Radius of gyration of each system plotted along the 100 ns of MD simulation.



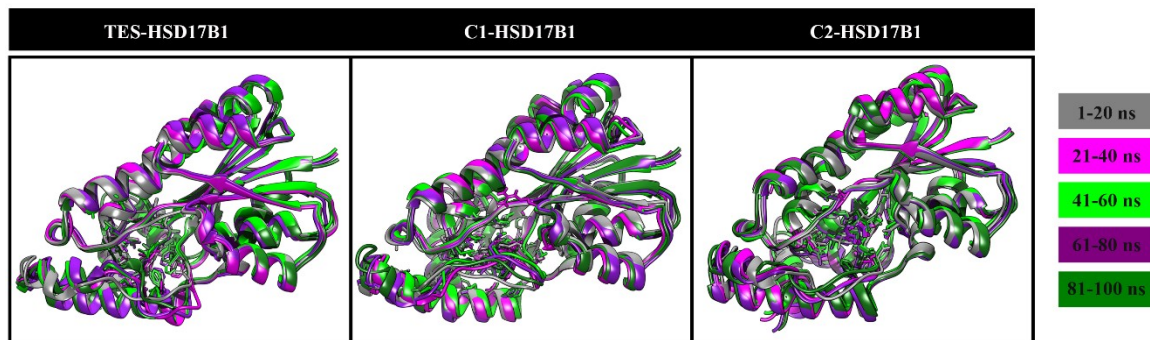

Fig. S4 The average conformational of each complex was plotted along 100 ns for each period.

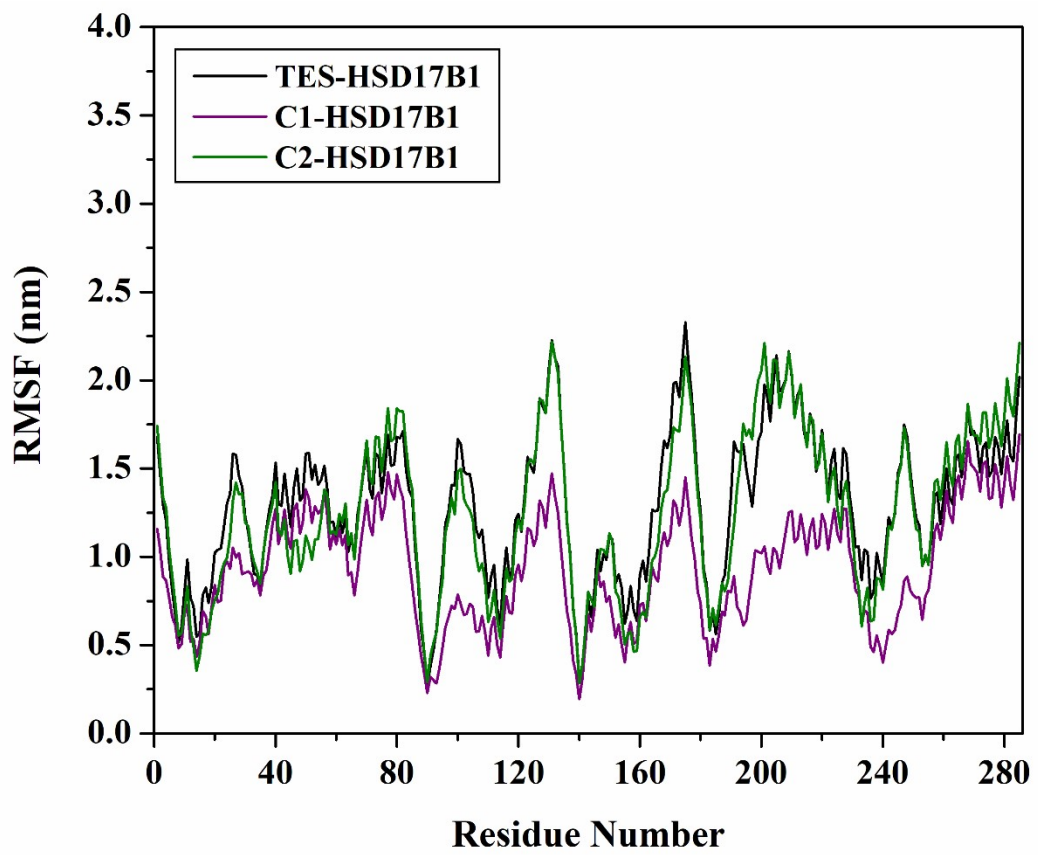

Fig. S5 Trajectories analysis: The root-mean-square fluctuation of each complex was plotted along 100 ns for each period.

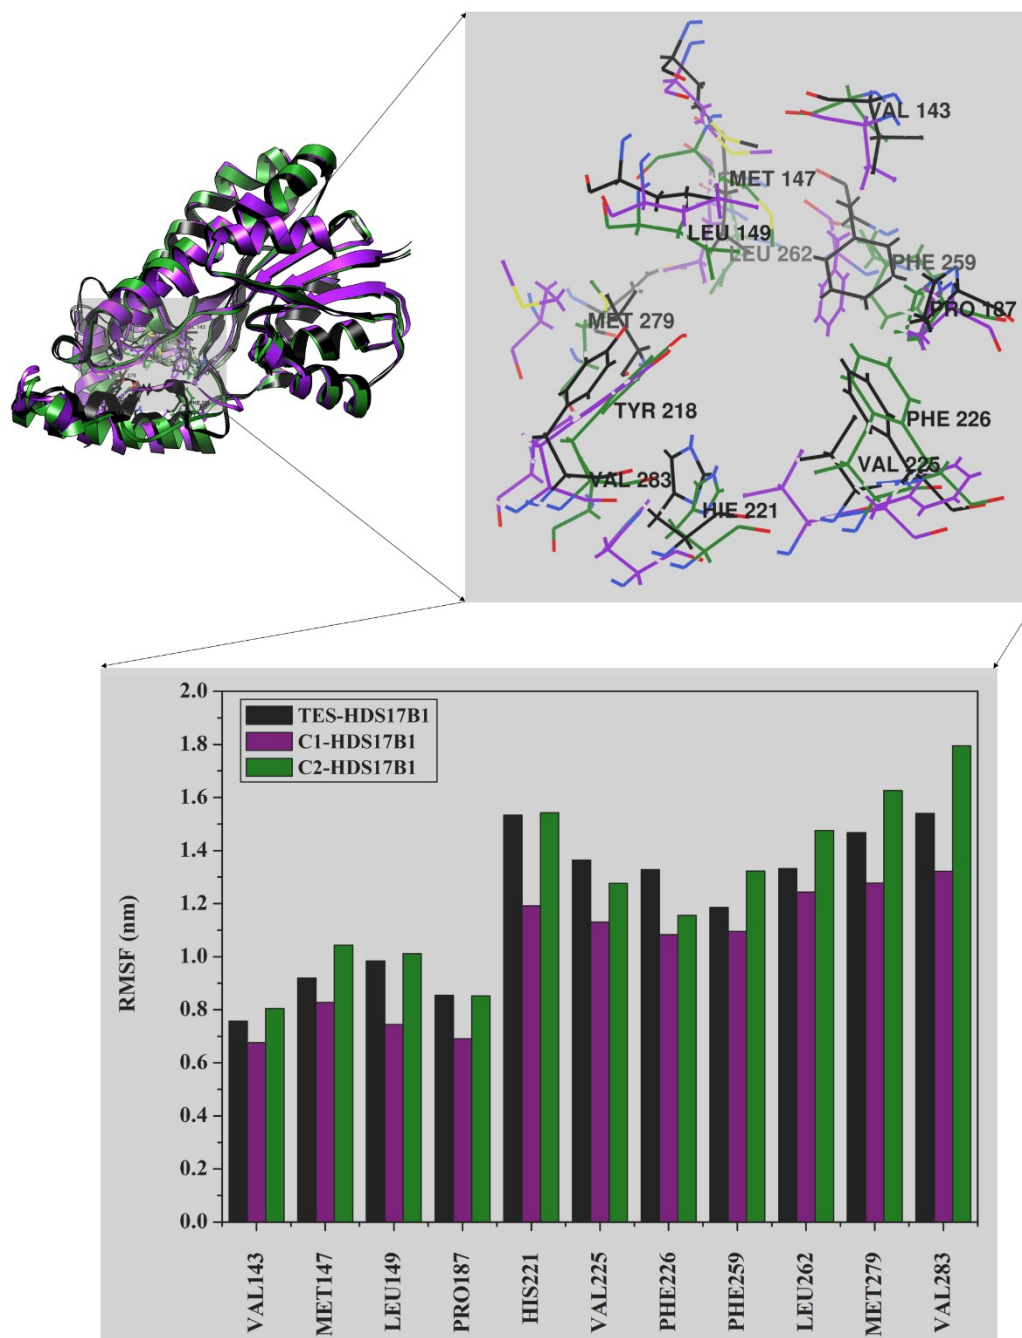

Fig. S6 The key residues conformational on the HSD17B1 active site shows by the RMSF value during the simulation time.

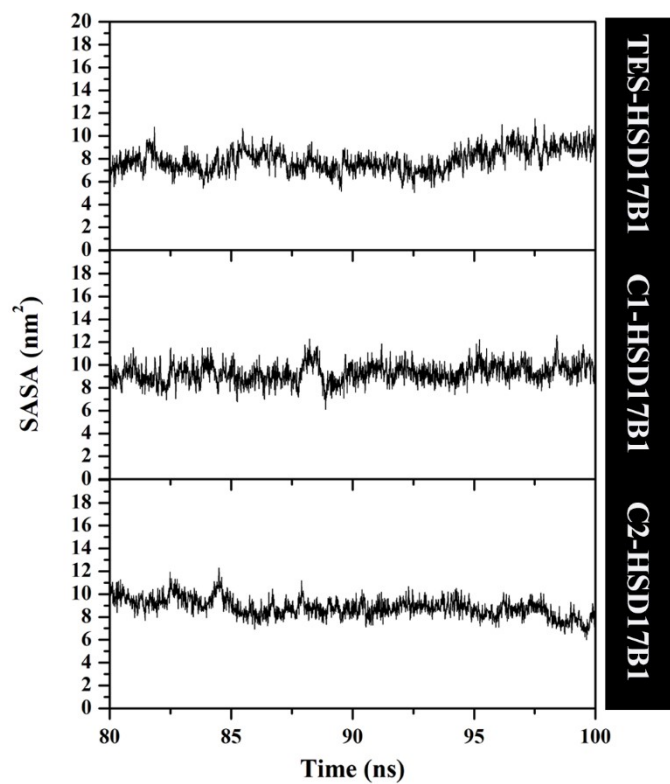

Fig. S7 Trajectories analysis during the simulation over the last 20 ns: The solvent-accessible surface area in the active site (radius 5 Å).
